# Supplementary material
Source: PubMed Central journal article supplement (PMC2834819)
Supplement: NIHMS174239-supplement-1.pdf [file NIHMS174239-supplement-1.pdf]

**SUPPORTING INFORMATION**  
**MRI Sensing Based on Displacement of Paramagnetic Ions**  
**from Chelated Complexes**

Tatjana Atanasijevic, Xiao-an Zhang, Stephen J. Lippard, and Alan Jasanoff

| <b>Table of Contents</b>                                                              | <b>page</b> |
|---------------------------------------------------------------------------------------|-------------|
| 1. Experimental section                                                               | S2          |
| 2. Supplemental references                                                            | S4          |
| 3. Suppl. Fig. 1: Relaxation rates in control conditions                              | S5          |
| 4. Suppl. Fig. 2: Calcium dependence of relaxivity ratios                             | S6          |
| 5. Suppl. Fig. 3: Modeling of inner sphere relaxation changes for Mn <sub>4</sub> CaM | S7          |
| 6. Suppl. Fig. 4: $T_1$ changes in the presence of competitor ions                    | S8          |
| 7. Suppl. Fig. 5: $T_2$ changes in the presence of competitor ions                    | S9          |

## EXPERIMENTAL SECTION

**Binding and competition assays.** Chemicals were purchased from Sigma-Aldrich (St. Louis, MO). Chloride salts of  $\text{Mn}^{2+}$ ,  $\text{Ca}^{2+}$ ,  $\text{Zn}^{2+}$ ,  $\text{Mg}^{2+}$ , and  $\text{K}^+$  were used, along with  $\text{Na}_4\text{EGTA}$  and  $\text{Na}_4\text{BAPTA}$ . Hexahistidine-tagged *Xenopus laevis* CaM E104Q was purified by nickel affinity chromatography (Qiagen, Valencia, CA) from *E. coli*, as described previously.<sup>[1]</sup> All solutions were formulated in MOPS buffer (30 mM 3-(*N*-morpholino)propanesulfonic acid, pH = 7.2) or artificial cerebrospinal fluid (150 mM NaCl, 3 mM KCl, 0.8 mM  $\text{MgCl}_2$ , 0.8 mM  $\text{Na}_2\text{HPO}_4$ , 0.02 mM  $\text{NaH}_2\text{PO}_4$ , pH = 7.4).

**Magnetic resonance imaging and analysis.** Mixtures prepared as described above were arrayed into 384-well microtiter plates (80  $\mu\text{L}$ /well) modified to fit into a 9 cm birdcage resonator probe (Bruker Instruments, Billerica, MA). Probe and sample were positioned within a 40 cm bore Magnex 4.7 T magnet equipped with Bruker 12 cm inner-diameter gradients (26 G/cm maximum) and scanned at room temperature (22 °C) using a 200 MHz Avance console running Paravision 3.0 (Bruker Instruments). Images were acquired using a multi-echo spin echo pulse sequence, with repetition times ranging from 0.1-5.0 s and echo times from 10-320 ms, across a 2 mm horizontal slice positioned to transect the middle of each microtiter well (in-plane resolution 0.47 mm, field of view 60 x 60 mm, 1-16 echos). Data were analyzed offline using custom routines implemented in Matlab (Mathworks, Natick, MA). Relaxation times were obtained by fitting monoexponential decay functions to image intensities averaged over each microtiter well; relaxivities were calculated using the known sample concentrations. Where shown throughout the text, error margins represent standard errors of the mean of multiple measurements. Data visualization and additional numerical analysis were performed with KaleidaGraph (Synergy Software, Reading, PA). These procedures included fitting of CaM titration data to the binding equation  $\Theta = [\text{Ca}^{2+}]^n / (\text{EC}_{50} + [\text{Ca}^{2+}]^n)$ ,

where  $\Theta$  is the fractional relaxivity change,  $n$  is the Hill coefficient, and  $EC_{50}$  is the transition midpoint. Involvement of the CaM histidine tag in relaxivity changes was excluded by performing a calcium titration on 25  $\mu\text{M}$  hexahistidine-tagged ubiquitin (Sigma-Aldrich) in the presence of 100  $\mu\text{M}$   $\text{MnCl}_2$ . Values of  $r_1$  and  $r_2$  showed no noticeable  $[\text{Ca}^{2+}]$  dependence in a range from 0-20 mM, and the presence or absence of the tagged protein did not significantly alter the relaxation rates recorded from 100  $\mu\text{M}$   $\text{Mn}^{2+}$ .

**Relaxivity modeling.** For comparison with experimental results, inner sphere longitudinal relaxivities of  $\text{Mn}_4\text{CaM}$  and  $\text{Mn}^{2+}$  (aq) at 4.7 T and 22 °C were estimated using the Solomon-Bloembergen-Morgan equations.<sup>[2-4]</sup> Calculations were performed in Matlab with a  $\text{Mn}^{2+}$ -proton distance  $r = 2.9 \text{ \AA}$ ,<sup>[5]</sup> hyperfine coupling constant  $A/h = 1 \text{ MHz}$ ,<sup>[4]</sup> and electronic relaxation time  $T_{1e}$  fixed at 2  $\mu\text{s}$ .<sup>[6]</sup> Values of  $r_1/q$  were computed over a range of  $\tau_M$  and  $\tau_R$  values. Specific estimates for the  $\tau_M$  and  $\tau_R$  of  $\text{Mn}^{2+}$  (aq) and  $\text{Mn}_4\text{CaM}$  were obtained from literature sources: for  $\text{Mn}^{2+}$  (aq)  $\tau_M = 50 \text{ ns}$ <sup>[7]</sup> and  $\tau_R = 30 \text{ ps}$ <sup>[8]</sup> were assumed, and for  $\text{Mn}_4\text{CaM}$   $\tau_M = 2.3 \text{ ns}$  (from Mn-EDTA<sup>[9]</sup>) and  $\tau_R = 12 \text{ ns}$  (from apo-CaM<sup>[10]</sup>) were estimated. Qualitative features of the modeling results persisted under reasonable variation of the estimated parameters. The crystal structure of calbindin loop 2 in complex with  $\text{Mn}^{2+}$  (Fig. 1c)<sup>4</sup> suggests by analogy that each  $\text{Mn}^{2+}$ -bound EF hand of CaM will have  $q = 2$ .  $\text{Ca}^{2+}$  ions complexed to CaM or calbindin loop 2 each coordinate one water molecule only.<sup>[11, 12]</sup>

## SUPPLEMENTAL REFERENCES

- [1] T. Atanasijevic, A. Jasanoff, *Nat Protoc* **2007**, 2, 2582.
- [2] I. Solomon, *Phys. Rev.* **1955**, 99, 559.
- [3] N. J. Bloembergen, *J. Chem. Phys.* **1957**, 27, 572.
- [4] N. Bloembergen, L. O. Morgan, *J. Chem. Phys.* **1961**, 34, 842.
- [5] S. Richards, B. Pedersen, J. V. Silverton, J. L. Hoard, *Inorg Chem* **1964**, 3, 27.
- [6] J. S. Troughton, M. T. Greenfield, J. M. Greenwood, S. Dumas, A. J. Wiethoff, J. Wang, M. Spiller, T. J. McMurry, P. Caravan, *Inorg Chem* **2004**, 43, 6313.
- [7] T. J. Swift, R. E. Connick, *J. Chem. Phys.* **1962**, 37, 307.
- [8] P. Caravan, C. T. Farrar, L. Frullano, R. Uppal, *Contrast Media Mol Imaging* **2009**, 4, 89.
- [9] D. W. Margerum, G. R. Cayley, D. C. Weatherburn, G. K. Pagenkopf, in *Coordination Chemistry, Vol. 2* (Ed.: A. E. Martell), American Chemical Society, Washington, DC, **1978**, pp. 1.
- [10] N. Tjandra, H. Kuboniwa, H. Ren, A. Bax, *Eur J Biochem* **1995**, 230, 1014.
- [11] R. Chattopadhyaya, W. E. Meador, A. R. Means, F. A. Quioco, *J Mol Biol* **1992**, 228, 1177.
- [12] M. Andersson, A. Malmendal, S. Linse, I. Ivarsson, S. Forsen, L. A. Svensson, *Protein Sci* **1997**, 6, 1139.

## Supplementary Figure 1

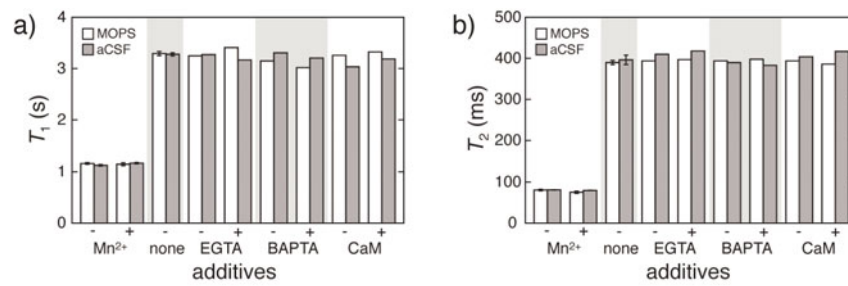

**Supplementary Figure 1.** a)  $T_1$  and b)  $T_2$  values recorded from control samples lacking (-) or containing (+) 1 mM CaCl<sub>2</sub>, and other additives noted. Additive concentrations were 100  $\mu$ M for Mn<sup>2+</sup>, EGTA, and BAPTA, and 25  $\mu$ M for CaM. Samples were formulated in 30 mM MOPS buffer (white bars) or aCSF (gray bars). Standard errors of the mean indicated for samples where multiple measurements were made ( $n = 2-3$ ).

## Supplementary Figure 2

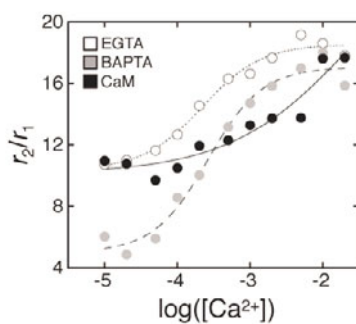

**Supplementary Figure 2.** Graphs of the  $T_2$  to  $T_1$  relaxivity ratio ( $r_2/r_1$ ) as a function of calcium concentration for EGTA (open circles), BAPTA (gray circles), and CaM (black circles); data are equivalent to those in Fig. 2 of the main text. All three ligands display substantial  $r_2/r_1$  changes over the calcium range investigated (most pronounced for BAPTA), indicating the possibility of ratiometric  $[\text{Ca}^{2+}]$  determination using  $\text{Mn}^{2+}$  displacement-based agents.

### Supplementary Figure 3

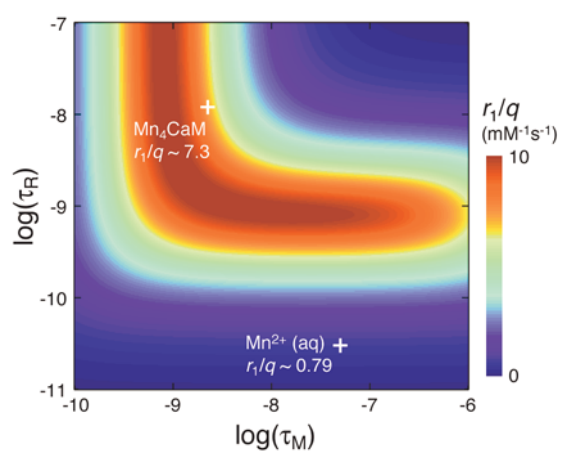

**Supplementary Figure 3.** Inner sphere longitudinal relaxivity per bound water molecule ( $r_1/q$ ) computed from the Solomon-Bloembergen-Morgan equations, using parameters chosen to approximate behavior of  $S = 5/2$   $\text{Mn}^{2+}$  complexes at 4.7 T and 22 °C. Rotational and water exchange time constants ( $\tau_R$  and  $\tau_M$ ) span ranges including reasonable estimates for  $\text{Mn}_4\text{CaM}$  and  $\text{Mn}^{2+}(\text{aq})$  (combinations marked by white crosses); additional parameters were fixed, as described in the experimental section. The calculated  $r_1/q$  values predict that  $\text{Mn}_4\text{CaM}$  with  $q = 1$  or 2 would display significantly greater relaxivity than  $\text{Mn}^{2+}(\text{aq})$ , as was observed experimentally.

## Supplementary Figure 4

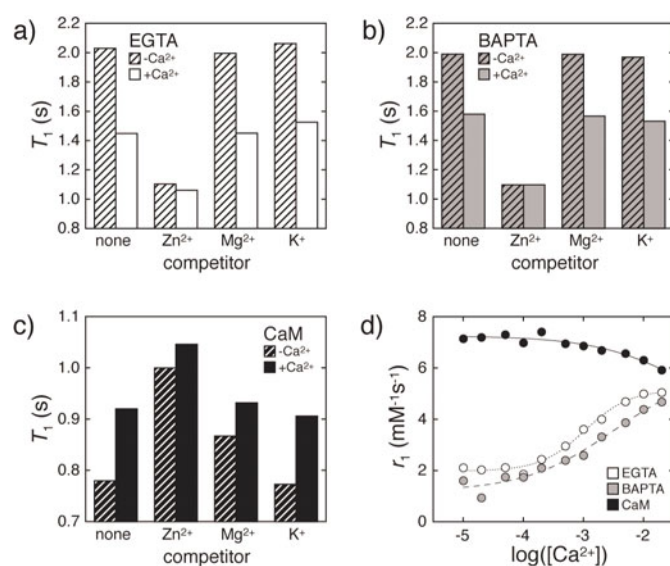

**Supplementary Figure 4.** Calcium-dependent  $T_1$  changes recorded from 100  $\mu\text{M}$  Mn<sup>2+</sup> mixtures with a) 100  $\mu\text{M}$  EGTA, b) 100  $\mu\text{M}$  BAPTA, or c) 25  $\mu\text{M}$  CaM, in the absence or presence of competing diamagnetic cations (each 1 mM), and in the absence (striped bars) or presence (solid bars) of 1 mM Ca<sup>2+</sup>. d) Titration of Ca<sup>2+</sup> against Mn-EGTA, Mn-BAPTA, or Mn<sub>4</sub>CaM in artificial cerebrospinal fluid, showing effects of biomimetic ion concentrations on titration curves. Mn<sup>2+</sup>, Ca<sup>2+</sup>, and binding ligand concentrations as in main text Fig. 2b. Note that 1 mM Ca<sup>2+</sup> did not bring about maximal relaxivity changes for any of the ligands. 1 mM Zn<sup>2+</sup> was more effective at displacing Mn<sup>2+</sup> than 1 mM Ca<sup>2+</sup>, and therefore resulted in larger relaxation changes for all three chelators. The biologically relevant competitors Mg<sup>2+</sup> and K<sup>+</sup> did not alter calcium responses observed for Mn-EGTA and Mn-BAPTA, however, and Mg<sup>2+</sup> only partially attenuated the Mn<sub>4</sub>CaM response to 1 mM Ca<sup>2+</sup>.



## Supplementary Figure 5

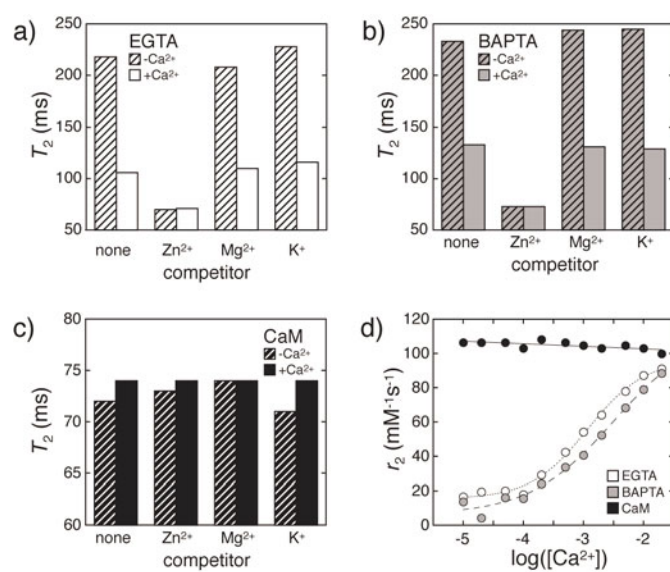

**Supplementary Figure 5.**  $T_2$  values measured from samples containing a) Mn-EGTA, b) Mn-BAPTA, and c) Mn<sub>4</sub>CaM, each in the absence (striped bars) or presence (solid bars) of 1 mM Ca<sup>2+</sup> and designated competitor ions (1 mM), and corresponding to the  $T_1$  measurements presented in Supplemental Fig. 4. d) Titration curves of  $r_2$  vs. calcium concentration for mixtures containing 100  $\mu$ M Mn<sup>2+</sup> with equimolar EGTA (open circles), BAPTA (gray circles), or 25  $\mu$ M CaM (black circles).
